# Supplementary material
Source: MDPI journal article supplement (https://www.mdpi.com/2311-553X/9/5/57)
Supplement: s1 [file s1]

## BOK circRNA sequences

Note: The unique yellow-highlighted “A” appearing in circ-BOK-12 is “G” in the genomic *BOK* sequence.

### >circ-BOK-1

CCCCACCGTCTCCAAGGCGATGAGCTGGAGATGATCCGGCCCAGCGTCTACCGCAACGTGGCGCGTCAGC  
TGCACATCTCCCTGCAGTCTGAGCCTGTGGTGACCGATGCGTTCCCTGGCCGTGGCTGGCCACATCTTCTC  
TGCAGGCATCACGTGGGGCAAGGTGGTGTCCCTGTATGCGGTGGCCGCGGGGCTGGCCGTGGACTGTGTG  
AGGCAGGCCAGCCTGCCATGGTCCACGCCCTCGTGGACTGCCTGGGGGAGTTCGTGCGCAAGACCCTGG  
CAACCTGGCTGCGGAGACGCGGCGGATGGACTGATGTCCTCAAGTGTGTGGTCAGCACAGACCCTGGCCT  
CCGCTCCCACTGGCTGGTGGCTGCACTCTGCAGCTTCGGCCGCTTCCTGAAGGCTGCCTTCTTCGTGCTG  
CTGCCAGAGAGATGAGCTGCCCACCTGGCAGTGGCCGCAGCCTGGCCCTCTGGGCCCCAACGCAGGAGGCC  
CTCAGCACCCGAACACATCTTCCTCCTCCCCACCCAGCCTGGAGCACTCTAACCTCGGAGACCCCTA  
AG

### >circ-BOK-2

GATGATCCGGCCCAGCGTCTACCGCAACGTGGCGCGTCAGCTGCACATCTCCCTGCAGTCTGAGCCTGTG  
GTGACCGATGCGTTCCCTGGCCGTGGCTGGCCACATCTTCTCTGCAGACTGATGTCCTCAAGTGTGTGGTC  
AGCACAGACCCTGGCCTCCGCTCCCACTGGCTGGTGGCTGCACTCTGCAGCTTCGGCCGCTTCCTGAAGG  
CTGCCTTCTTCGTGCTGCTGCCAGAGA

### >circ-BOK-3

CACATCTTCTCTGCAGGCATCACGTGGGGCAAGGTGGTGTCCCTGTATGCGGTGGCCGCGGGGCTGGCCG  
TGGACTGTGTGAGGCAGGCCAGCCTGCCATGGTCCACGCCCTCGTGGACTGCCTGGGGGAGTTCGTGCG  
CAAGACCCTGGCAACCTGGCTGCGGAGACGCGGCGGATGGACTGATGTCCTCAAGTGTGTGGTCAGCACA  
GACCCTGGCCTCCGCTCCCACTGGCTGGTGGCTGCACTCTGCAGCTTCGGCCGCTTCCTGAAGGCTGCCT  
TCTTCGTGCTGCTGCCAGAGAGATGAGCTGCCCACCTGGCAGTGGCCGCAGCCTGGCCCTCTGGGCCCCAA  
CGCAGGAGGCCCTCAGCACCCGAA

### >circ-BOK-4

CTGCGCCTGGCGATGAGCTGGAGATGATCCGGCCCAGCGTCTACCGCAACGTGGCGCGTCAGCTGCACA  
TCTCCCTGCAGTCTGAGCCTGTGGTGACCGATGCGTTCCCTGGCCGTGGCTGGCCACATCTTCTCTGCAGA  
CTGATGTCCTCAAGTGTGTGGTCAGCACAGACCCTGGCCTCCGCTCCCACTGGCTGGTGGCTGCACTCTG  
CAGCTTCGGCCGCTTCCTGAAGGCTGCCTTCTTCGTGCTG

### >circ-BOK-5

CCTCCGAGGCCCCCCATTGGAACTGCGCCACCGGGCTGGGTAGCCAAAACCTCAGTATTTCGTTGGTG  
CTGTGAGGACATCTGGGGGTGCTCGGTTCTGGGGTCACACACGGTCCACTGGCTGCCCCACCGTCTCCA  
AGGCGATGAGCTGGAGATGATCCGGCCCAGCGTCTACCGCAACGTGGCGCGTCAGCTGCACATCTCCCTG  
CAGTCTGAGCCTGTGGTGACCGATGCGTTCCCTGGCCGTGGCTGGCCACATCTTCTCTGCAGGCATCACGT  
GGGGCAAGGTGGTGTCCCTGTATGCGGTGGCCGCGGGGCTGGCCGTGGACTGTGTGAGGCAGGCCAGCC  
TGCCATGGTCCACGCCCTCGTGGACTGCCTGGGGGAGTTCGTGCGCAAGACCCTGGCAACCTGGCTGCGG  
AGACGCGGCGGATGGACTGATGTCCTCAAGTGTGTGGTCAGCACAGACCCTGGCCTCCGCTCCCACTGGC

TGGTGGCTGCACTCTGCAGCTTCGGCCGCTTCCTGAAGGCTGCCTTCTTCGTGCTGCTGCCAGAGAGATG  
AGCTGCCCACCTGGCAGTGGCCGAGCCTGGCCCTCTGGGCCCCAACGCAGGAGGCCCTCAGCACCCGAAC  
ACATCTTCCTCCTCCCCACCCGAGCCTGGAGCACTCTAACCCTCGGAGACCCCCCTAAGCCCCGTT

#### >circ-BOK-6

CACCTGCTCTTGTGACCACACAGGCGATGAGCTGGAGATGATCCGGCCCAGCGTCTACCGCAACGTGGCG  
CGTCAGCTGCACATCTCCCTGCAGTCTGAGCCTGTGGTGACCGATGCGTTCCCTGGCCGTGGCTGGCCACA  
TCTTCTCTGCAGGCATCACGTGGGGCAAGGTGGTGTCCCTGTATGCGGTGGCCGCGGGGCTGGCCGTGGA  
CTGTGTGAGGCAGGCCAGCCTGCCATGGTCCACGCCCTCGTGGA CTGCCTGGGGGAGTTTCGTGCGCAAG  
ACCCTGGCAACCTGGCTGCGGAGACGCGGCGGATGGACTGATGTTCCTCAAGTGTGTGGTCAGCACAGACC  
CTGGCCTCCGCTCCCACTGGCTGGTGGCTGCACTCTGCAGCTTCGGCCGCTTCCTGAAGGCTGCCTTCTT  
CGTGCTGCTGCCAGAGAGATGAGCTGCCACCTGGCAGTGGCCGAGCCTGGCCCTCTGGGCCCCAACGCA  
GGAGGCCCTCAGCACCCGAACACATCTTCCTCCTCCCCACCCGAGCCTGGAGCACTCTAACCCTCGGAGA  
CCCCCTAAGCCCCGTTCCCTCCGAGACCCAGGCCCTCCGGAAGGGGTGAGTGGGGAGGGGCTTTCTCTGAG  
CCTGGAGCTGGGCTTTGGGGCAGCCTGCGACCCTCCCCGCTTGTGTCCCTTCTCCTGTGATCTCTGTGTT  
TTCCCTTTTCTTTCTGGGGCCAGGAAGTCAGGGTCAACTCCCAGGCCTCAGATGCAGGGGCCAGAA

#### >circ-BOK-7

CTGAGCCTGTGGTGACCGATGCGTTCCTGGCCGTGGCTGGCCACATCTTCTCTGCAGGCATCACGTGGGG  
CAAGGTGGTGTCCCTGTATGCGGTGGCCGCGGGGCTGGCCGTGGACTGTGTGAGGCAGGCCAGCCTGCC  
ATGGTCCACGCCCTCGTGGA CTGCCTGGGGGAGTTTCGTGCGCAAGACCCTGGCAACCTGGCTGCGGAGAC  
GCGGCGGATGGACTGATGTTCCTCAAGTGTGTGGTCAGCACAGACCCTGGCCTCCGCTCCCACTGGCTGGT  
GGCTGCACTCTGCAGCTTCGGCCGCTTCCTGAAGGCTGCCTTCTTCGTGCTG

#### >circ-BOK-8

CTGCGCTGGCGATGAGCTGGAGATGATCCGGCCCAGCGTCTACCGCAACGTGGCGCGTCAGCTGCACA  
TCTCCCTGCAGTCTGAGCCTGTGGTGACCGATGCGTTCCTGGCCGTGGCTGGCCACATCTTCTCTGCAGG  
CATCACGTGGGGCAAGGTGGTGTCCCTGTATGCGGTGGCCGCGGGGCTG

#### >circ-BOK-9

GACAGCGGCCAGCCAGCCAGGTGGGAGCGTGGCAGTGCGGGTGGCCCAGGACAGCGGCTCAGCCTCTG  
CATCTGAGTGGTCCCTGAGCCATGCTAGGGCCTGAGCCGGGCTCTCGGGCTGTCCCCTGCTCTCACCCCA  
ATGCTTTCTCTGCCCAGCCCCTCCCCACGTCGGGCTCCCCTGCTCTCACCCAGTGCTTTCTCTGCCCAG  
CCCCTCCCCACGTCGGGGTCTGGCCGTCTGCCTGGTCCCTCCTGCTCTGGGCAGCTCGGCTGCCTGTCTGG  
CTGTGAGTCACCAGCAGGCACGGCCCACGCTCTCGCAGGATTCCCGCCCCACCGGCTTGGCCGGCTAGGC  
TTAGGGGCTGGCTCGTCAGAGGGGCGGGACTGGGGGCGCCTTCAGTACTTCCTTGGTCTTCTGGTCCCTA  
GGGGCCAAGGTTGGGGGATGGCCCAAGGGAGGTGAGTGGGGTCAAGTGGAGGTGGGAATCAGACAAGTG  
AGGAACAGGCTGGAATTCAAGCATGGTCAGGTGGGGGTGAGGTGCAGGGTGTGCCCCAAGCCAGTCGTGT  
CCCAGGAAGCTGGGACGTGGGCTGCCTCTCACCTGCTCTTGTGACCACACAGGCGATGAGCTGGAGATGA  
TCCGGCCCAGCGTCTACCGCAACGTGGCGCGTCAGCTGCACATCTCCCTGCAGTCTGAGCCTGTGGTGAC  
CGATGCGTTCCCTGGCCGTGGCTGGCCACATCTTCTCTGCAGGTATGCCAGCCTGCCCGTCCCATGGGAC  
CTCAGGGAGGGATCCAGGGTCTGTGGCTCAG

>circ-BOK-10

ACTGATGTCCTCAAGTGTGTGGTCAGCACAGACCCTGGCCTCCGCTCCCACTGGCTGGTGGCTGCACTCT  
GCAGCTTCGGCCGCTTCCTGAAGGCTGCCTTCTTCGTGCTGCTGCCAGAGAGATGAGCTGCCCACCTGGC  
AGTGGCCGCAGCCTGGCCCTCTGGGCCCAACGCAGGAGGCCCTCAGCACCCGAACACATCTTCCTCCTCC  
CCACCCGAGCCTGGAGCACTCTAACCCTCGGAGACCCCTAAGCCCCGTTCTCCGCAGACCCAGGCCCT  
CCGGAAGGG

>circ-BOK-11

GCTGCACATCTCCCTGCAGTCTGAGCCTGTGGTGACCGATGCGTTCCTGGCCGTGGCTGGCCACATCTTC  
TCTGCAGGCATCACGTGGGGCAAGGTGGTGTCCCTGTATGCGGTGGCCGCGGGGCTGGCCGTGGACTGTG  
TGAGGCAGGCCAGCCTGCCATGGTCCACGCCCTCGTGGACTGCCTGGGGGAGTTCGTGCGCAAGACCCT  
GGCAACCTGGCTGCGGAGACGCGGCGGATGGACTGATGTCCTCAAGTGTGTGGTCAGCACAGACCCTGGC  
CTCCGCTCCCACTGGCTGGTG

>circ-BOK-12

AGGCTGCTCCCATCTCAGTTCAGCCTCAGCAGGTTAGGGGTCTGGGGAAGGCAGTTTCTCTGCGGGCCTC  
AGCTTCTTTATGTGTAAAATGTGGACGCCAGGCCTGTTGTGGGAACAGGCAGCCCAGGGGTGCCACCCGT  
GAGGTCACCTGGCTGCTCACTCCATCTGCTGCTGCCCTCAGTTCCCTCGCCTCACCCACGTTGTCCCTGC  
GGCTCCTGCACAGACGTGGGCTGGGCAGGTGTGCAGTGGAGGCCGAGAAACCTGCCTGCCCAAGAACTA  
CCTGACAGGCATCCTGTCAGGGAGCGGTCCCCCTTGGGACGGTCCCTGGTCATTAGCTGGACGGCAAGC  
AGGACAGCGGCTCAGAGAGGCCAGCCCCCTTCCTTAAGTGCTCCCGTGGGCGGGATTCAAGTCCTGATCT  
TGACCATCTCTCTCCCTGCAGGCATCACGTGGGGCAAGGTGGTGTCCCTGTATGCGGTGGCCGCGGGGCT  
GGCCGTGGACTGTGTGAGGCAGGCCAGCCTGCCATGGTCCACGCCCTCGTGGACTGCCTGGGGGAGTTC  
GTGCGCAAGACCCTGGCAACCTGGCTGCGGAGACGCGGCGGATGGGTGAGCGCCTGAGTGCCCGTGTGGG  
TGAGAG

>circ-BOK-13

GATGAGCTGGAGATGATCCGGCCCAGCGTCTACCGCAACGTGGCGCGTCAGCTGCACATCTCCCTGCAGT  
CTGAGCCTGTGGTGACCGATGCGTTCCTGGCCGTGGCTGGCCACATCTTCTCTGCAGGCATCACGTGGGG  
CAAGGTGGTGTCCCTGTATGCGGTGGCCGCGGGGCTGGCCGTGGACTGTGTGAGGCAGGCCAGCCTGCC  
ATGGTCCACGCCCTCGTGGACTGCCTGGGGGAGTTCGTGCGCAAGACCCTGGCAACCTGGCTGCGGAGAC  
GCGGCGGATGGACTGATGTCCTCAAGTGTGTGGTCAGCACAGACCCTGGCCTCCGCTCCCACTGGCTGGT  
GGCTGCACTCTGCAGCTTCGGCCGCTTCCTGAAGGCTGCCTTCTTCGTGCTGCTGCCAGAGA

>circ-BOK-14

GGTGTGCGCGGTGCTGCTGCGCCTGGGCGATGAGCTGGAGATGATCCGGCCCAGCGTCTACCGCAACGTG  
GCGCGTCAGCTGCACATCTCCCTGCAGTCTGAGCCTGTGGTGACCGATGCGTTCCTGGCCGTGGCTGGCC  
ACATCTTCTCTGCAGGCATCACGTGGGGCAAGGTGGTGTCCCTGTATGCGGTGGCCGCGGGGCTGGCCGT  
GGACTGTGTGAGGCAGGCCAGCCTGCCATGGTCCACGCCCTCGTGGACTGCCTGGGGGAGTTCGTGCGC  
AAGACCCTGGCAACCTGGCTGC

>circ-BOK-15

CACAGAAACCCCAAGACTTCCGTCCCCCTCCTGTCTTCCTCCTGTGGAGTCTGGCATGGGGCTGGGCACTG  
TGTGCCAGTGGGCGACGACACTTTGAGCAACGCCAAGGCCACAGGTCCAGGCTGCAGGGAAAAGCCTTC

ATGTATTAGCAGGAAGTGAAGGGAATAAGAGAATTGGACGTTCAATTCACCTCCCCAGAAGGAACTTCAGA  
GTCCAGGGAGTCCGTGGGCTTCCGGAAACGCAGTCCCTGCTGTTGTTCCAGGCAGAGTCTGAATGAAGCT  
GGGTTTGCCCTTCCTGGTAGCCAGGCTCCAAGGCCCCACAGGAGGATGACGGCGGCATACCTGTAGCC  
CCTGGGGGGCAGCAGGCAGGTGGCCGAGGGGAGCTGGCACCCCTGGTCTGGATGTCTGGAGCCCCAGCGAG  
GGCCATGAAGGCCTCTCTCCTGCTCGGCAGGGGCCCTCCGGCCGGCCTGCCTGGCTGCCATCTGTCCCA  
CCTCCCGTGCTCCTGGCCCTTCACACTGTCTGAATGTGCACGGCATCGGGTCTGGTCTTGTGTTGGAGC  
CTTCAGTCCAGGCCACAGACCTCCTTCCCGAACAGTCTCCTGCATTCCCTTCATGCAATTTTGCTGATAT  
TCTGGTGCACGGTGTCTGGGGGGCCTGGCGGTGCTGGGGGCCTGGCGGTGCTGGCTCTGCTTTCTAACGGT  
CTCCCTCTTCCCTCCAGACTGATGTCCCTCAAGTGTGTGGTCAGCACAGACCCTGGCCTCCGCTCCCACT  
GGCTGGTGGCTGCACTCTGCAGCTTCGGCCGCTTCCTGAAGGCTGCCTTCTTCGTGCTGCTGCCAGAGAG  
ATGAGCTGCCACCTGGCAGTGGCCGAGCCTGGCCCTCTGGGCCAACGCAGGAGGCCCTCAG

#### >circ-BOK-16

GCCCCAAGCCAGTCGTGTCCAGGAAGCTGGGACGTGGGCTGCCTCTCACCTGCTCTTGTGACCACACAG  
GCGATGAGCTGGAGATGATCCGGCCCAGCGTCTACCGCAACGTGGCGCGTCAGCTGCACATCTCCCTGCA  
GTCTGAGCCTGTGGTGACCGATGCGTTCCTGGCCGTGGCTGGCCACATCTTCTCTGCAGGTATGCCCAGC  
CTGCCCCTCCATGGGACCTCAGGGAGGGATCCAGGGTCTGTGGCTCAGGCTCACAGGGACCCCCACGAGC  
TG

#### >circ-BOK-17

GTGCTGCTGCGCCTGGATTCTTGCTGTTACTGGCCGAGATCCCGCCCGCTGCCCTCTGGATTCCGAGGCC  
TCCGAGGCCCCCATTTGGAAACTGCGCCACCGGGCTGGGTAGCCAAAACCTCAGTATTCGTTGGTGCT  
GTGAGGACATCTGGGGGTGCTCGGTTCTGGGGTCAACACAGGTCCACTGGCTGCCCCACCGTCTCCAAG  
GCGATGAGCTGGAGATGATCCGGCCCAGCGTCTACCGCAACGTGGCGCGTCAGCTGCACATCTCCCTGCA  
GTCTGAGCCTGTGGTGACCGATGCGTTCCTGGCCGTGGCTGGCCACATCTTCTCTGCAGGCATCACGTGG  
GGCAAGGTGGTGTCCCTGTATGCGGTGGCCGCGGGGCTGGCCGTGGACTGTGTGAGGCAGGCCACGCCTG  
CCATGGTCCACGCCCTCGTGGACTGCCTGGGGGAGTTCGTGCGCAAGACCCTGGCAACCTGGCTGCGGAG  
ACGCG

#### >circ-BOK-18

TGGCTGGCCACATCTTCTCTGCAGGCATCACGTGGGGCAAGGTGGTGTCCCTGTATGCGGTGGCCGCGGG  
GCTGGCCGTGGACTGTGTGAGGCAGGCCAGCCTGCCATGGTCCACGCCCTCGTGGACTGCCTGGGGGAG  
TTCGTGCGCAAGACCCTGGCAACCTGGCTGCGGAGACGCGCGGATGGACTGATGTCCTCAAGTGTGTGG  
TCAGCA

#### >circ-BOK-19

GCATCACGTGGGGCAAGGTGGTGTCCCTGTATGCGGTGGCCGCGGGGCTGGCCGTGGACTGTGTGAGGCA  
GGCCCAGCCTGCCATGGTCCACGCCCTCGTGGACTGCCTGGGGGAGTTCGTGCGCAAGACCCTGGCAACC  
TGGCTGCGGAGACGCGCGGATGGACTGATGTCCTCAAGTGTGTGGTCAGCACAGACCCTGGCCTCCGCT  
CCCCTGGCTGGTGGCTGCACTCTGCAGCTTCGGCCGCTTCCTGAAGGCTGCCTTCTTCGTGCTGCTGCC  
AGAGAGATGAGCTGCCCACCTGGCAGTGGCCGAGCCTGGCCCTCTGGGCCCAACGCAGGAGGCCCTCAG  
CACCCGAACACATCTTCCTCCTCCCCACCCGAGCCTGGAGCACTCTAACCTCGGAGACCCCCTAAGCCC  
CGTTCTCCGAGACCCAGGCCCTCCGGAAGGG

**>circ-BOK-20**

GCATCACGTGGGGCAAGGTGGTGTCCCTGTATGCGGTGGCCGCGGGGCTGGCCGTGGACTGTGTGAGGCA  
GGCCAGCCTGCCATGGTCCACGCCCTCGTGGACTGCCTGGGGGAGTTCGTGCGCAAGACCCTGGCAACC  
TGGCTGCGGAGACGCGGCGGATGGACTGATGTCCTCAAGTGTGTGGTCAGCACAGACCCTGGCCTCCGCT  
CCCACTGGCTGGTGGCTGCACTCTGCAG

**>circ-BOK-21**

CGGAGACGCGGCGGATGGACTGATGTCCTCAAGTGTGTGGTCAGCACAGACCCTGGCCTCCGCTCCCACT  
GGCTGGTGGCTGCACTCTGCAGCTTCGGCCGCTTCCTGAAGGCTGCCTTCTTCGTGCTGCTGCCAGAGAG  
ATGAGCTGCCACCTGGCAGTGGCCGCAGCCTGGCCCTCTGGGCCCCAACGCAGGAGGCCCTCAGCACCCG  
AACACATCTTCCTCCTCCCCACCCGAGCCTGGAGCACTCTAACCT

**>circ-BOK-22**

GCCTGGCTGAGGTGTGCGCGGTGCTGCTGCGCCTGGGCGATGAGCTGGAGATGATCCGGCCCAGCGTCTA  
CCGCAACGTGGCGCGTCAGCTGCACATCTCCCTGCAGTCTGAGCCTGTGGTGACCGATGCGTTCTTGCC  
GTGGCTGGCCACATCTTCTCTGCAGGCATCACGTGGGGCAAGGTGGTGTCCCTGTATGCGGTGGCCGCGG  
GGCTGGCCGTGGACTGTGTGAGGCAGGCCAGCCTGCCATGGTCCACGCCCTCGTGGACT

**>circ-BOK-23**

GTCCACGCCCTCGTGGACTGCCTGGGGGAGTTCGTGCGCAAGACCCTGGCAACCTGGCTGCGGAGACGCG  
GCGGATGGACTGATGTCCTCAAGTGTGTGGTCAGCACAGACCCTGGCCTCCGCTCCCACTGGCTGGTGGC  
TGCACTCTGCAGCTTCGGCCGCTTCCTGAAGGCTGCCTTCTTCGTGCTGCTGCCAGAGAGATGAGCTGCC  
CACCTGGCAGTGGCCGCAGCCTGGCCCTCTGGGCCCCAACGCAGGAGGCCCTCAGCACCCGAACACATCTT  
CCTCCTCCCCA
